# Supplementary material for: Revaccination with Live Attenuated Vaccines Confer Additional Beneficial Nonspecific Effects on Overall Survival: A Review
Source: PubMed Central journal article supplement — eBioMedicine. 2016 Jul 15;10:312–7. doi: 10.1016/j.ebiom.2016.07.016 (PMC5006692; doi:10.1016/j.ebiom.2016.07.016), 2016-07-15
Supplement: mmc1.pdf [file mmc1.pdf]

## Supplementary material

### Supplementary figure 1. Literature search for measles revaccination and mortality

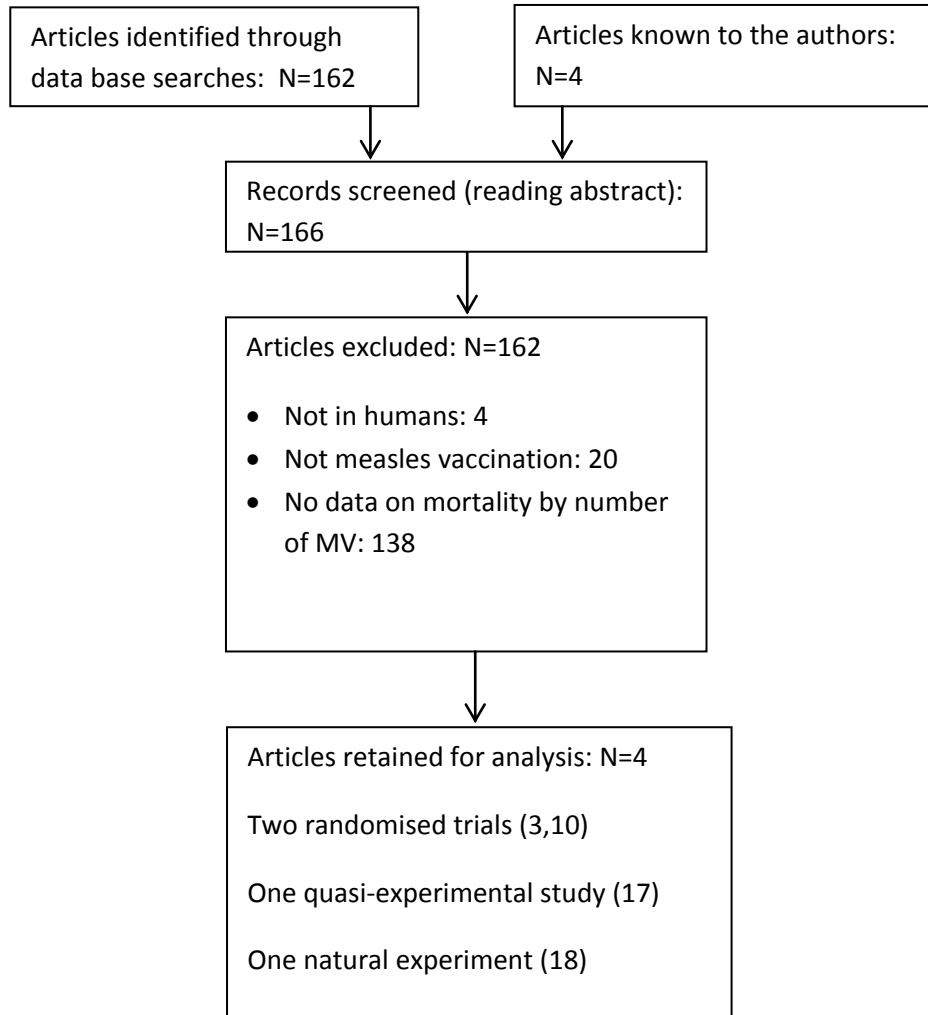

Notes: Searches: (measle\* and (vaccination or vaccine) and ("immunization, secondary" or ("immunization" and "secondary") or "secondary immunization" or "re?vaccination" or "two?dose" or "multiple vaccination") and ("mortality" or ("death" or "deaths"))), two-dose/twodose measles vaccination and mortality/deaths [June 2016]

## Supplementary figure 2. Literature search for BCG revaccination and mortality

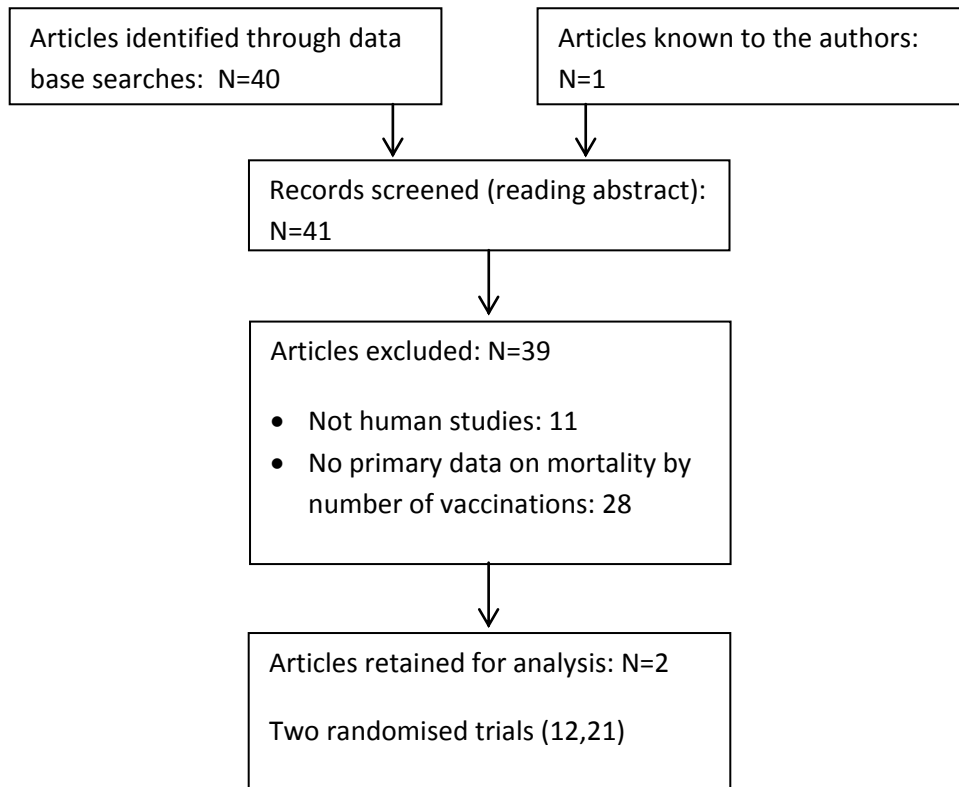

Notes: Searches: (BCG and ("immunization, secondary" or ("immunization" and "secondary") or "secondary immunization" or "re?vaccination" or "two?dose" or "multiple vaccination") and ("mortality" or ("death" or "deaths"))). [June 2016]

**Supplementary figure 3. Literature search for polio or OPV revaccination/re-vaccination and mortality**

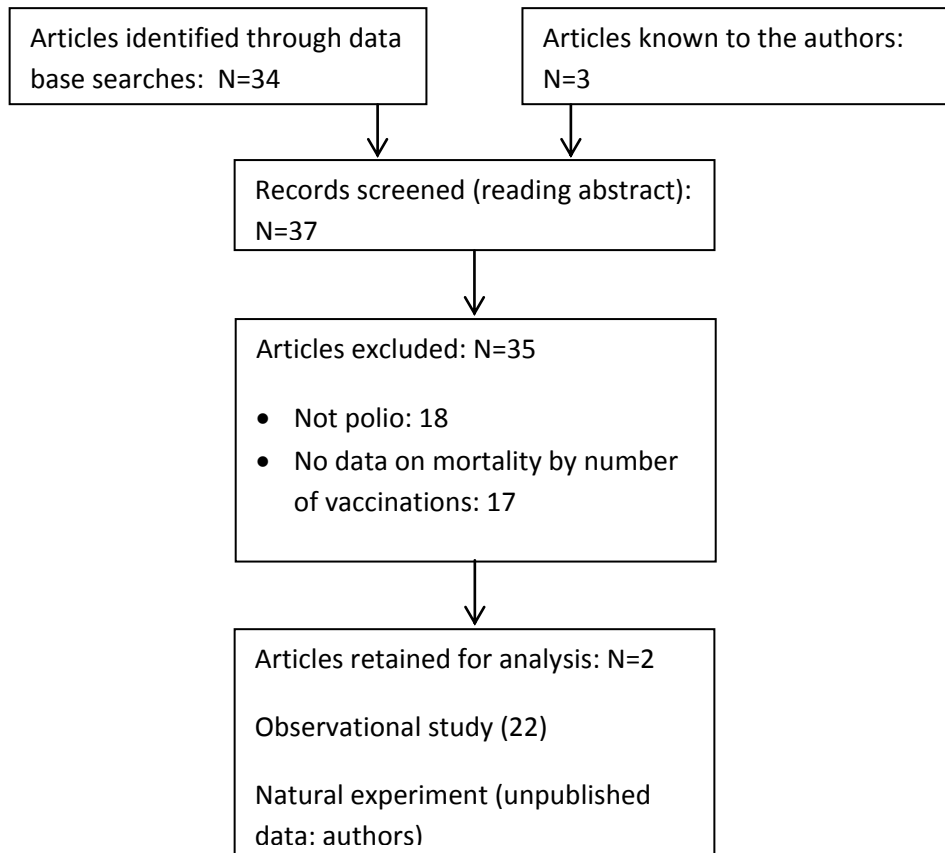

Notes: Searches: ((polio\* or OPV) and (vaccination or vaccine) and ("immunization, secondary" or ("immunization" and "secondary") or "secondary immunization" or "re?vaccination" or "two?dose" or "multiple vaccination") and ("mortality" or ("death" or "deaths")))) [June 2016]

**Supplementary figure 4. Literature search for smallpox revaccination/smallpox scars and mortality**

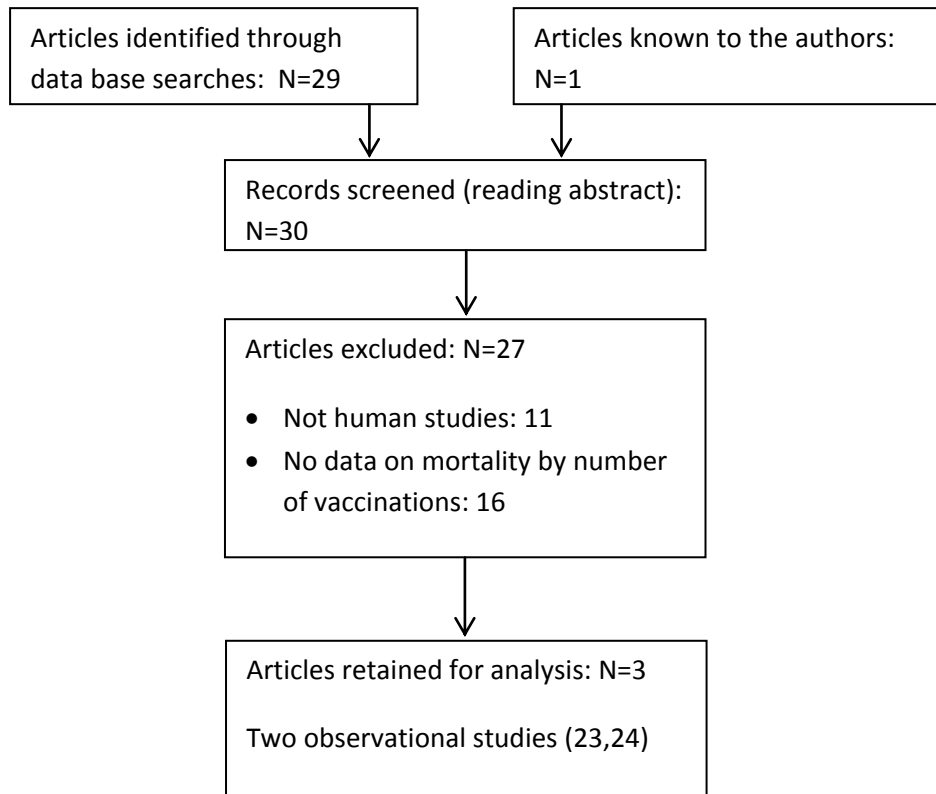

Notes: Searches: (smallpox and (vaccinia or vaccination or vaccine) and ("immunization, secondary" or ("immunization" and "secondary") or "secondary immunization" or "re?vaccination" or "two?dose" or "multiple vaccination") and ("mortality" or ("death" or "deaths"))), smallpox scars and mortality/deaths [June 2016]

**Supplementary figure 5. Literature search for measles vaccination of measles immune children and mortality**

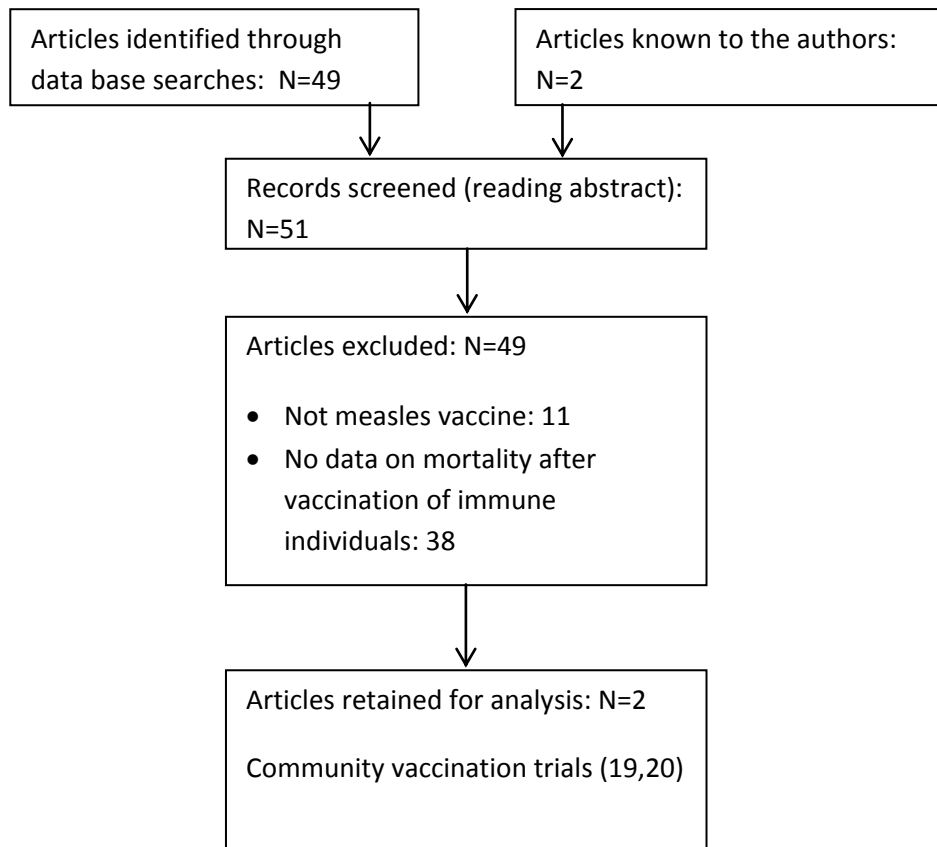

Notes: Searches: Measles vaccination of measles immune or previous measles and mortality/deaths [June 2016]
